# Supplementary material for: Mitochondria play an important role in the cell proliferation suppressing activity of berberine
Source: PubMed Central journal article supplement (PMC5299431; doi:10.1038/srep41712), 2017-02-09
Supplement: srep41712-s1.pdf [file srep41712-s1.pdf]

---

## Supplementary information

# Mitochondria play an important role in the cell proliferation suppressing activity of berberine

Xiao-Jin Yan<sup>†</sup>, Xuan Yu<sup>†</sup>, Xin-Pei Wang<sup>†</sup>, Jing-Fei Jiang, Zhi-Yi Yuan, Xi Lu, Fan Lei, Dong-  
Ming Xing\*

MOE Key Laboratory of Protein Sciences, Laboratory of Molecular Pharmacology and  
Pharmaceutical Sciences, School of Life Sciences, Tsinghua University, Beijing 100084, China

<sup>†</sup> Equal in contribution

To whom correspondence should be addressed:

Dong-Ming Xing

MOE Key Laboratory of Protein Sciences, Laboratory of Molecular Pharmacology and  
Pharmaceutical Sciences, School of Life Sciences,

Tsinghua University,

Beijing 100084, China

Tel: +86-10-62796270

E-mail: [pharm@mail.tsinghua.edu.cn](mailto:pharm@mail.tsinghua.edu.cn)

---

## Supplementary Information

**Figure S1. Dose of BBR or rotenone for HepG2 cell viability.** Cell number was determined with a hemocytometer. **(A).** HepG2 cell number after BBR treatment at the indicated dose for 24 h. Mean  $\pm$ SEM; NS no significant difference, n = 3. **(B).** HepG2 cell number after rotenone treatment at the indicated dose for 24 h. Mean  $\pm$ SEM; NS no significant difference, n = 3.

**Figure S2. Mice body weight gain in the HepG2 xenograft model.** (A). Mice body weight gain in the HepG2 xenograft model. Mean  $\pm$ SEM; \*p < 0.05, n = 6.

**Table S1. Primer sequences used in the experiment**

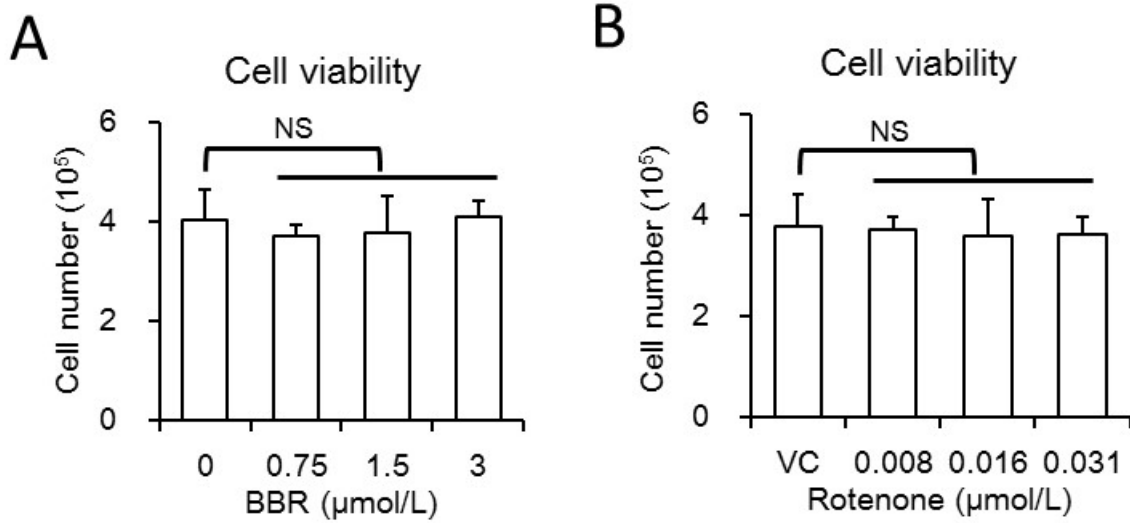

**Figure S1. Dose of BBR or rotenone for HepG2 cell viability.** Cell number was determined with a hemocytometer. **(A).** HepG2 cell number after BBR treatment at the indicated dose for 24 h. Mean  $\pm$ SEM; NS no significant difference, n = 3. **(B).** HepG2 cell number after rotenone treatment at the indicated dose for 24 h. Mean  $\pm$ SEM; NS no significant difference, n = 3.

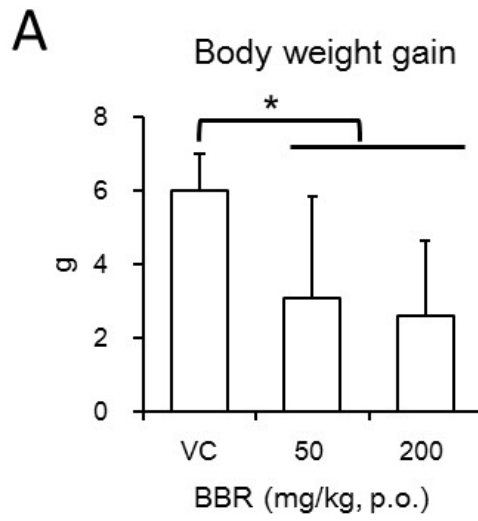

**Figure S2. Mice body weight gain in the HepG2 xenograft model. (A).** Mice body weight gain in the HepG2 xenograft model. Mean  $\pm$ SEM; \* $p < 0.05$ ,  $n = 6$ .

**Table S1. Primer sequences used in the experiment**

| Targeted sequence    | Primer sequence                          | Product size(bp) |
|----------------------|------------------------------------------|------------------|
| Human genome DNA     | Sense 5'- TGCTGAGTCACCTTCGAACC-3'        | 562              |
|                      | Anti-sense 5'- AGCATAACCTGACACCAGCC-3'   |                  |
| Human mtDNA          | Sense 5'- ACAATTCTCCGATCCGTCCC-3'        | 136              |
|                      | Anti-sense 5'- GTGATTGGCTTAGTGGGCGA-3'   |                  |
| Mouse genome DNA     | Sense 5'- CCTATCAGTTCGGAGCCCAC-3'        | 586              |
|                      | Anti-sense 5'- TGGAACTCACCCGTTACACAC-3'  |                  |
| Mouse mtDNA          | Sense 5'- AGCTCAATCTGCTTACGCCA-3'        | 150              |
|                      | Anti-sense 5'- TGTGAGGCCATGTGCGATTA-3'   |                  |
| Human $\beta$ -actin | Sense 5'- AGGCTGGTCCTCCTATCGTT-3'        | 201              |
|                      | Anti-sense 5'- AGGCTGGTCCTCCTATCGTT-3'   |                  |
| Human OPA1           | Sense 5'- GTGGTTGGAGATCAGAGTGCTG-3'      | 130              |
|                      | Anti-sense 5'- GAGGACCTTCACTCAGAGTCAC-3' |                  |
| Human Mfn1           | Sense 5'- GGTGAATGAGCGGCTTTCCAAG-3'      | 135              |
|                      | Anti-sense 5'- TCCTCCACCAAGAAATGCAGGC-3' |                  |
| Human Mfn2           | Sense 5'- ATTGCAGAGGCGGTTGCGACTCA-3'     | 104              |
|                      | Anti-sense 5'- TTCAGTCGGTCTTGCCGCTCTT-3' |                  |
| Human DAPK2          | Sense 5'- GCACCACAATGTCATCACGCTG-3'      | 125              |
|                      | Anti-sense 5'- CCTCACTCAGTGACTCCTTCTG-3' |                  |
| Human Fis1           | Sense 5'- CAAGGAACTGGAGCGGCTCATT-3'      | 124              |
|                      | Anti-sense 5'- GGACACAGCAAGTCCGATGAGT-3' |                  |
| Human TFAM           | Sense 5'- GAGCGTGCTAAAAGCACTGG -3'       | 238              |
|                      | Anti-sense 5'- CCACAGGGCTGCAATTTTCC -3'  |                  |
| Human HK2            | Sense 5'- GAGTTTGACCTGGATGTGGTTGC-3'     | 130              |
|                      | Anti-sense 5'- CCTCCATGTAGCAGGCATTGCT-3' |                  |
| Human GCK            | Sense 5'- GGCCACCAAGAAGGAAAAGGT-3'       | 254              |
|                      | Anti-sense 5'- CCTCTCCCACTTTGACCAGCA-3'  |                  |
| Human PGI            | Sense 5'- GTGTACCTTCTAGTCCCGCC-3'        | 159              |

---

|                    |                                           |     |
|--------------------|-------------------------------------------|-----|
|                    | Anti-sense 5'- TGGTGTGAGGGTCAAGCTG-3'     |     |
| Human PFK1         | Sense 5'- AAGAAGTAGGCTGGCACGACGT-3'       | 113 |
|                    | Anti-sense 5'- GCGGATGTTCTCCACAATGGAC-3'  |     |
| Human ALDO1        | Sense 5'- CCACGAGACCCTCTACCAGA-3'         | 253 |
|                    | Anti-sense 5'- GATAGCGAGGCTGGATGGAC-3'    |     |
| Human TPI          | Sense 5'- AACTGGAAGATGAACGGGCG-3'         | 143 |
|                    | Anti-sense 5'- TTGGGATCTAGCTTCTGCCG-3'    |     |
| Human GADPH        | Sense 5'- CTCTGCTCCTCCTGTTCGAC-3'         | 121 |
|                    | Anti-sense 5'- GCGCCAATACGACCAAATC-3'     |     |
| Human PGK1         | Sense 5'- CCACTGTGGCTTCTGGCATA-3'         | 166 |
|                    | Anti-sense 5'- ATGAGAGCTTTGGTTCCCG-3'     |     |
| Human PGAM1        | Sense 5'- GCTCTGCCCTTCTGGAATGAAG-3'       | 155 |
|                    | Anti-sense 5'- ATACCAGTCGGCAGGTTTCAGCT-3' |     |
| Human Eno1         | Sense 5'- AGTCAACCAGATTGGCTCCGTG-3'       | 130 |
|                    | Anti-sense 5'- CACAACCAGGTCAGCGATGAAG-3'  |     |
| Human PKLR         | Sense 5'- CGGAAGGACACGGCATCAAGAT-3'       | 150 |
|                    | Anti-sense 5'- GAGCCAGGAAAACCTTCTCTGC-3'  |     |
| Human PKM2         | Sense 5'- AATGCAGTCCTGGATGGAGC-3'         | 228 |
|                    | Anti-sense 5'- ACTGCAGCACTTGAAGGAGG-3'    |     |
| Human LDH $\alpha$ | Sense 5'- AGCTGTTCCACTTAAGGCC-3'          | 119 |
|                    | Anti-sense 5'- AGGAATCGGGAATGCACGTC-3'    |     |
| Human PDHA         | Sense 5'- GGATGGTGAACAGCAATCTTGCC-3'      | 148 |
|                    | Anti-sense 5'- TCGCTGGAGTAGATGTGGTAGC-3'  |     |
| Human Cs           | Sense 5'- CACAGGGTATCAGCCGAACCAA-3'       | 128 |
|                    | Anti-sense 5'- CCAATACCGCTGCCTTCTCTGT-3'  |     |
| Human Aco2         | Sense 5'- CAATCGTCACCTCCTACAACAGG-3'      | 133 |
|                    | Anti-sense 5'- GTCTCTGGGTGAACTTGAGGG-3'   |     |
| Human IDH3A        | Sense 5'- TCGGTGTGACACCAAGTGGCAA-3'       | 100 |
|                    | Anti-sense 5'- TTCGCCATGTCCTTGCCTGCAA-3'  |     |
| Human OGDH         | Sense 5'- GAGGCTGTCATGTACGTGTGCA-3'       | 140 |

---

|              |                                            |     |
|--------------|--------------------------------------------|-----|
|              | Anti-sense 5' - TACATGAGCGGCTGCGTGAACA-3'  |     |
| Human SUCLG1 | Sense 5' - CAAACTCGTTGGAGGAACCACTC-3'      | 138 |
|              | Anti-sense 5' - GCAGCAAAAGGCGGAGGAACAT-3'  |     |
| Human SDHA   | Sense 5' - GAGATGTGGTGTCTCGGTCCAT-3'       | 142 |
|              | Anti-sense 5' - GCTGTCTCTGAAATGCCAGGCA-3'  |     |
| Human FH     | Sense 5' - CCGCTGAAGTAAACCAGGATTATG-3'     | 126 |
|              | Anti-sense 5' - ATCCAGTCTGCCATAACCACGAG-3' |     |
| Human MDH2   | Sense 5' - CTGGACATCGTCAGAGCCAACA-3'       | 106 |
|              | Anti-sense 5' - GGATGATGGTCTTCCCAGCATG-3'  |     |

---
